# Supplementary material for: Insecticide resistance and underlying targets-site and metabolic mechanisms in Aedes aegypti and Aedes albopictus from Lahore, Pakistan
Source: PubMed Central journal article supplement (PMC7907206; doi:10.1038/s41598-021-83465-w), 2021-02-25
Supplement: 41598_2021_83465_MOESM2_ESM.pdf [file 41598_2021_83465_MOESM2_ESM.pdf]

**Insecticide resistance and underlying targets-site and metabolic mechanisms in *Aedes aegypti* and *Aedes albopictus* from Lahore, Pakistan**

Rafi Ur Rahman, Barbara Souza, Iftikhar Uddin, Luana Carrara, Luiz Paulo Brito, Monique Melo Costa, Muhammad Asif Mahmood, Sozaina Khan, Jose Bento Pereira Lima, Ademir Jesus Martins

**A - *Aedes aegypti***

*Aedes aegypti* - *Nav* gene - IIS6 segment, exons 20-21

Pakistani population - IIS6 haplotypes

```

                                     989
      N V D R F P D K D L P R W N F T D F M H S F M I V F R V L C G E W I E S M W D C [993]
#PAg_2s6_1 ACAATGTGGATCGCTTCCCGGACAAGGACCTGCCACGGTGGAACTTCACCGACTTCATGCACTCATTCATGATCGTGTTCGGGTATTGTGCGGCGAGTGGATCGAATCCATGTGGGATT [120]
#PAg_2s6_2 .....

      M L V G D V S C I P F F L A T V V I G N L V [1015]
#PAg_2s6_1 GTATGCTTGTGGGTGACGTGTCCCTGATTCCGTTCTTTTGGCCACCGTAGTGATAGGAAATCTAGTAgtaagtattccgttttgaagttcatctgttaaggtgactgaaagtaaattgg [240]
#PAg_2s6_2 .....g.....a.....g.....

#PAg_2s6_1 agcgcaacacagacttattatgtctgttaattcgtgtattcaactagtttacaaaagaccgttgatcttgatagacatcaatattagaggcgtgtagacagcgagcgaggggcgtaccaatttac [360]
#PAg_2s6_2 ..t.....g.....t.....C.C.....

                                     1016
#PAg_2s6_1 ttttagtcagtcttttcttgcattctttctttcgtgtctaaccgacaaattgttttccactcgcacagaGTACTTAACTTTTCTTAGCCTTGCTTTTGTCCAATTCGGTTCATCCTCGCTGTCGG [480]
#PAg_2s6_2 ....g.....a.....C.....

      P T A D N E T N K I A E A F N R I S R F S N W I K S N I A N A L K F V K N K L T [1074]
#PAg_2s6_1 CACCGACGGCCGACAACGAAACGAACAAGATCGCGGAGGCGTTCAATCGGATATCGCGCTTCTCCAaCTGGATCAAGTcGAACATCGCCAACGCGCTCAAGTTCGTGAAAAACAAGTTAA [600]
#PAg_2s6_2 .....

      S Q I [1078]
#PAg_2s6_1 CAAGCCAGATTGC [613]
#PAg_2s6_2 .....

```

Underline = primers for sequencing  
Squares = common *kdr* sites

**Insecticide resistance and underlying targets-site and metabolic mechanisms in *Aedes aegypti* and *Aedes albopictus* from Lahore, Pakistan**

Rafi Ur Rahman, Barbara Souza, Iftikhar Uddin, Luana Carrara, Luiz Paulo Brito, Monique Melo Costa, Muhammad Asif Mahmood, Sozaina Khan, Jose Bento Pereira Lima, Ademir Jesus Martins

*Aedes aegypti* - Nav gene - IIIS6 segment  
Pakistani population - IIIS6 haplotypes

```

                                     1520:T/I
S R E V S Y C E I E L V T N D L L T I L R P R S F Q V G K Q P I R E T N I Y M Y
#PAg_3s6_1 TCGCGGGAGGTAAGTTATTGTGAAATCGAACTTGTTACGAATGATCTGCTTACAATTTTACGTCTCGATCCTCCAGGTGGGAAAGCAGCCGATTTCGCGAGACC AACATCTACATGTAC [120]
#PAg_3s6_2 .....
#PAg_3s6_3 .....T.....

                                     1534:F/C
L Y F V F F I I F G S F F T L N L F I G V I I D N F N E Q K K K A G G S L E M F
#PAg_3s6_1 CTCTACTTTGTGTTCTTCATCATCTTCGGGTCGTTCTTCACGCTGAATCTGTTTCATCGGTGTCATCATCGACAACCTCAACGAGCAGAAGAAGAAAGCCGGTGGCTCACTGGAAATGTTC [240]
#PAg_3s6_2 .....G.....
#PAg_3s6_3 .....G.....

M T E D Q K K Y Y N A M K K M G S K K P L K A I P R P R
#PAg_3s6_1 ATGACGGAGGATCAGAAAAAGTACTACAACGCCATGAAAAAGATGGGCTCGAAGAAGCCGCTGAAAGCTATTCCACGGCCTAGGtaaggcatttccatcgcacatcaac [350]
#PAg_3s6_2 .....
#PAg_3s6_3 .....

```

Similar sequences on GenBank

| Haplotype | GenBank accession number                                                                                                                                                                                                                                                                         |
|-----------|--------------------------------------------------------------------------------------------------------------------------------------------------------------------------------------------------------------------------------------------------------------------------------------------------|
| PAg_3s6-1 | MF794973, MF794979, MF794985, KM677248, KM677249, KM677255, KM677256, KM677258, KM677249, KY078303, MN413379, KF527415, KY046223, KY046225, KY046228, KY046229, KY046231, KY046237, KP861899, KM519597, MN602782.                                                                                |
| PAg_3s6-2 | MF794983, MF794989, KM677247, KM677253, KM677278, KM677267, KM677268, KM677266, KM677264, KM677273, KM677276, KM677263, MK005557, MK005556, MK005562, MK005567, MK005563, MK005564, MK005565, MK005566, MK005567, KY078304, MK495873, KF527414, KY046224, KY046232, KY046236, KP861896, MN602780 |
| PAg_3s6-3 | MF794977, KM677275, MN602779                                                                                                                                                                                                                                                                     |

**Insecticide resistance and underlying targets-site and metabolic mechanisms in *Aedes aegypti* and *Aedes albopictus* from Lahore, Pakistan**

Rafi Ur Rahman, Barbara Souza, Iftikhar Uddin, Luana Carrara, Luiz Paulo Brito, Monique Melo Costa, Muhammad Asif Mahmood, Sozaina Khan, Jose Bento Pereira Lima, Ademir Jesus Martins

**B - *Aedes albopictus***

*Aedes albopictus* - *Nav* gene - IIS6 segment, exons 20-21

Pakistani population - IIS6 haplotypes

882:L/M

N V D R F P D K D L P R W N F T D F M H S F M I V F R V L C G E W I E S M W D C

```
#PAb_2s6-1 ACAATGTGGATCGCTTCCCGGACAAGGACCTGCCGCGGTGGAACCTCACCGACTTCATGCACCTCGTTCATGATCGTGTCCGGGTGCTGTGCGGCGAGTGGATCGAATCCATGTGGGACT [120]
#PAb_2s6-2 .....
#PAb_2s6-3 .....
#PAb_2s6-4 .....R.....
#PAb_2s6-5 .....Y.....
```

M L V G D V S C I P F F L A T V V I G N L V

```
#PAb_2s6-1 GCATGTGGTTCGGCGACGTGTCTGTATTCCGTTCTTTTGGCCACCGTAGTGATAGGAAATCTAGTAGtaagtatcctctttcgtccagaagtgctgctgacctgacgaacgagtagtacta [240]
#PAb_2s6-2 .Y.....-----.....ta
#PAb_2s6-3 .....Y.....-----
#PAb_2s6-4 .T.....-----
#PAb_2s6-5 .Y.....sy.....k.yymrrmrkksykskkkrn.n.msr.ww.....
```

V L N L F L A L L L S N F G S S S L S A P T A D N E T N K I A

```
#PAb_2s6-1 atcggagaatgcttttcccccaatccagGTACTTAACCTTTTCTTAGCCTTGCTTTGTCCAATTCGGTTCATCGTTCGCTGTCGGCACCGACGCGCCGACAACGAAACGAACAAGATCG [360]
#PAb_2s6-2 .....Y.....Y.....Y.....
#PAb_2s6-3 -----
#PAb_2s6-4 -----
#PAb_2s6-5 .....w.y.....
```

E A F N R I S R F S N W I K S N I A N A L K F V K N K L T S Q I

```
#PAb_2s6-1 CGGAGGCGTTCAACCGGATATCGCGCTTCTCCAACCTGGATCAAGTCCAACATCGCCAACGCGCTCAAGTTCGTGAAAAACAAGTTAACAAGCCAGATTGC [460]
#PAb_2s6-2 .....
#PAb_2s6-3 -----
#PAb_2s6-4 -----
#PAb_2s6-5 .....

```

Similar sequences on GenBank

| Haplotype | GenBank accession number                                             |
|-----------|----------------------------------------------------------------------|
| PAb_2s6-2 | MK201618/ MK201609, MK201615, MK201617                               |
| PAb_2s6-4 | KX281169, KX281170, FJ479615, MK201602/ MK201609, MK201615, MK201617 |
| 882 TTG   | MF776970                                                             |

**Insecticide resistance and underlying targets-site and metabolic mechanisms in *Aedes aegypti* and *Aedes albopictus* from Lahore, Pakistan**

Rafi Ur Rahman, Barbara Souza, Iftikhar Uddin, Luana Carrara, Luiz Paulo Brito, Monique Melo Costa, Muhammad Asif Mahmood, Sozaina Khan, Jose Bento Pereira Lima, Ademir Jesus Martins

*Aedes albopictus* - *Nav* gene - IIIS6 segment  
Pakistani population - IIIS6 haplotypes

```

      Q V G K Q P I R E T N I Y M Y L Y F V F F I I F G S F F T L N L F I G V I I D N
#Pab_3s6-1 CAGGTGGGCAAGCAGCCGATTTCGCGAGACCAACATCTACATGTACCTCTACTTTGTGTTCTTCATCATCTTCGGGTCGTTCTTCACCCTCAACCTGTTTCATCGGTGTCATCATCGACAAC [120]
#Pab_3s6-2 .....C.....
#Pab_3s6-3 .....
#Pab_3s6-4 .....
#Pab_3s6-5 .....Y.....
#Pab_3s6-6 .....R.....Y.....Y..Y.....
#Pab_3s6-7 .....R.....Y.....Y..Y.....
#Pab_3s6-8 .....R.....Y.....C.....Y..Y.....

```

```

      F N E Q K K K A G G S L E M F M T E D Q K K Y Y N A M K K M G S K K P L K A I P
#Pab_3s6-1 TTCAACGAGCAGAAGAAGAAAGCCGGTGGCTCGCTGGAAATGTTTCATGACGGAGGATCAGAAAAAGTACTACAACGCAATGAAAAAGATGGGCTCGAAGAAGCCGCTGAAAGCTATCCCT [240]
#Pab_3s6-2 .....
#Pab_3s6-3 .....A.....
#Pab_3s6-4 .....R.....
#Pab_3s6-5 .....R.....
#Pab_3s6-6 .....
#Pab_3s6-7 .....R.....
#Pab_3s6-8 .....

```

```

      R P R V R
#Pab_3s6-1 CGGCCTAGGGTAAGG [255]
#Pab_3s6-2 .....
#Pab_3s6-3 .....
#Pab_3s6-4 .....
#Pab_3s6-5 .....
#Pab_3s6-6 .....
#Pab_3s6-7 .....
#Pab_3s6-8 .....

```

**Similar sequences on GenBank**

| Haplotype | GenBank accession number |
|-----------|--------------------------|
| PAb_3s6-1 | MN433760                 |
| PAb_3s6-2 | KC1552046, MN433786      |

**Insecticide resistance and underlying targets-site and metabolic mechanisms in *Aedes aegypti* and *Aedes albopictus* from Lahore, Pakistan**

Rafi Ur Rahman, Barbara Souza, Iftikhar Uddin, Luana Carrara, Luiz Paulo Brito, Monique Melo Costa, Muhammad Asif Mahmood, Sozaina Khan, Jose Bento Pereira Lima, Ademir Jesus Martins

**Alignment of IIS6 and IIS6 segments haplotypes of the voltage gated sodium channel gene of *Aedes aegypti* and *Aedes albopictus* from Lahore, Pakistan.** Nucleotides in the exon and intron regions are in upper- and lowercase letters, respectively. Dots indicate the same nucleotides as the haplotype in the first row. Non-synonymous SNPs changes are in red. The amino acid translation is indicated above the alignment in blue, numbered according to the Na<sub>v</sub> protein of *Musca domestica*, as reference. The regions of primers alignment are underlined.
